# Supplementary material for: Immunoglobulin G complexes without sialic acids enhance osteoclastogenesis but do not affect arthritis‐mediated bone loss
Source: PubMed Central journal article supplement — Scand J Immunol. 2020 Dec 22;93(5):e13009. doi: 10.1111/sji.13009 (PMC8243958; doi:10.1111/sji.13009), 2020-12-22
Supplement: SJI-93-e13009-s002.pdf [file SJI-93-e13009-s002.pdf]

Supp Figure 1.

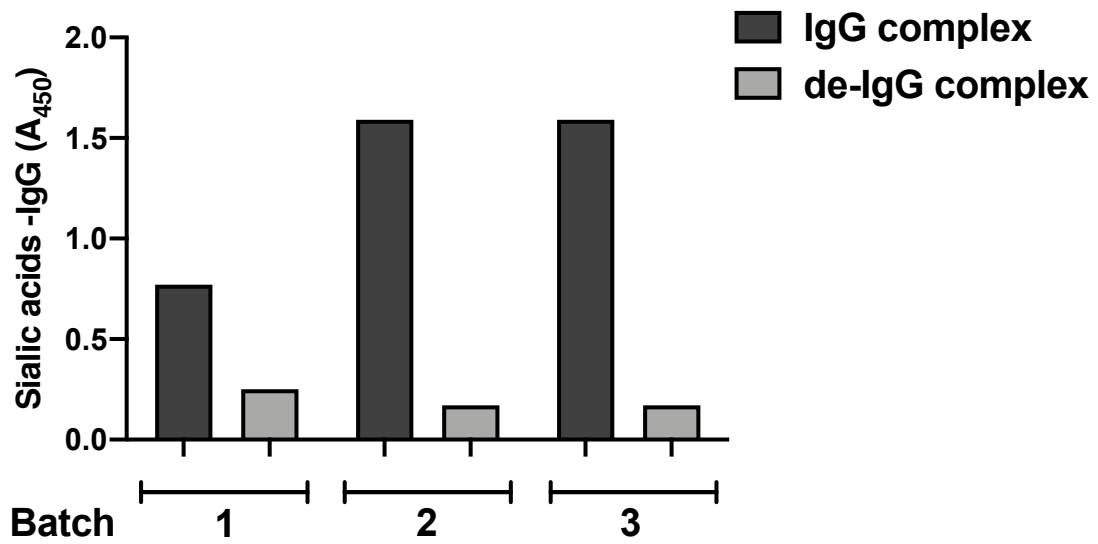

Concentration of sialic acids on IgG after IgG purification with protein G spin column and enzymatic digested with or without neuraminidase performed in three batches. All values are based on triplicates and the blank is taken away.

## Supp Figure 2.

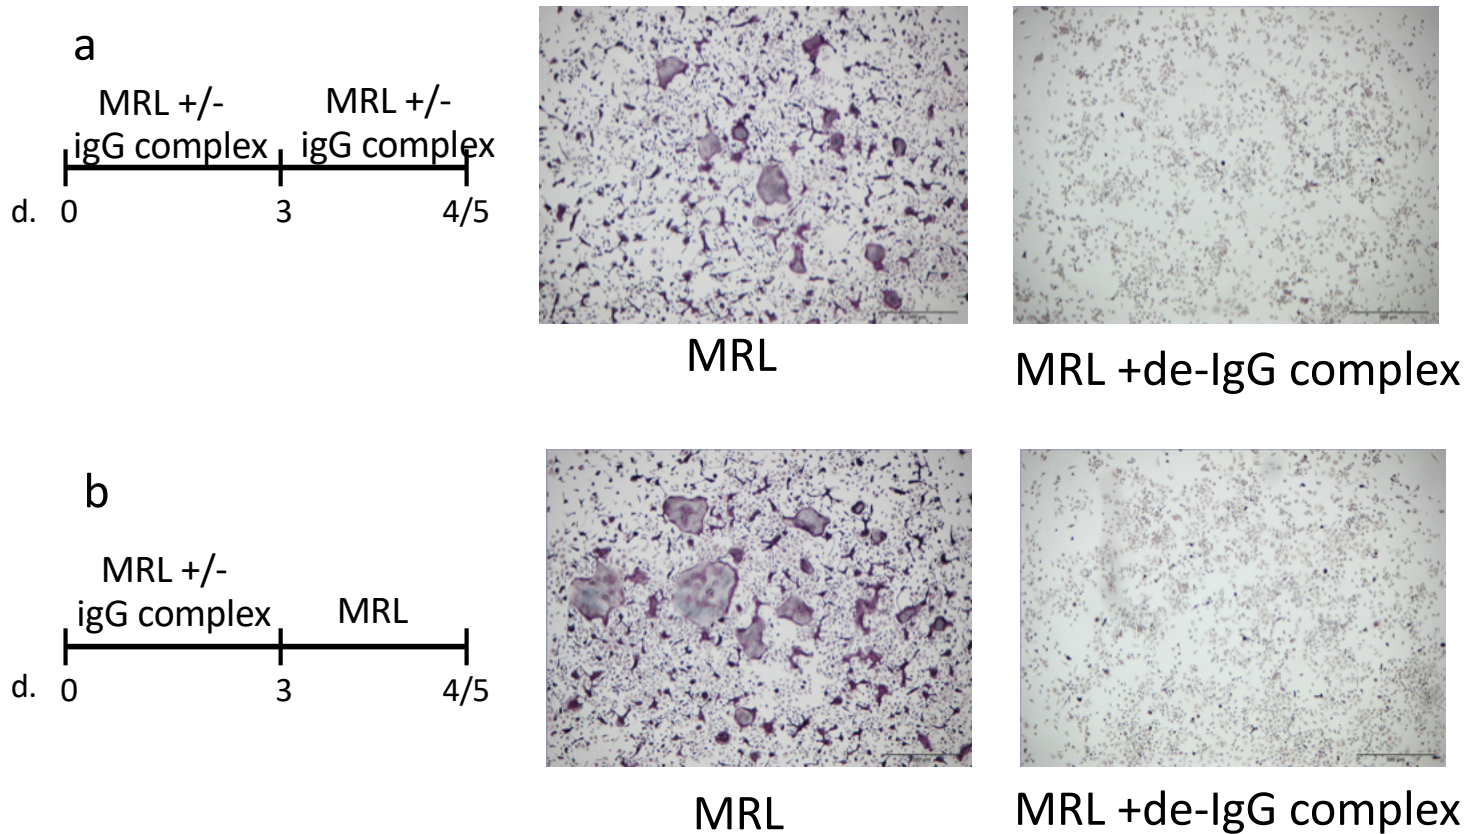

Representative micro images of murine osteoclast stimulation **a)** treatment over both time frames, from day 0 until determination with either M-CSF +RANKL (MRL) or with MRL + 0.1 mg·ml<sup>-1</sup> desialylated (de) IgG complex and **b)** treated the first time frame, day 0-3 with MRL or MRL+ de-IgG complex. Scale bar 500 μm.

### Supp Figure 3.

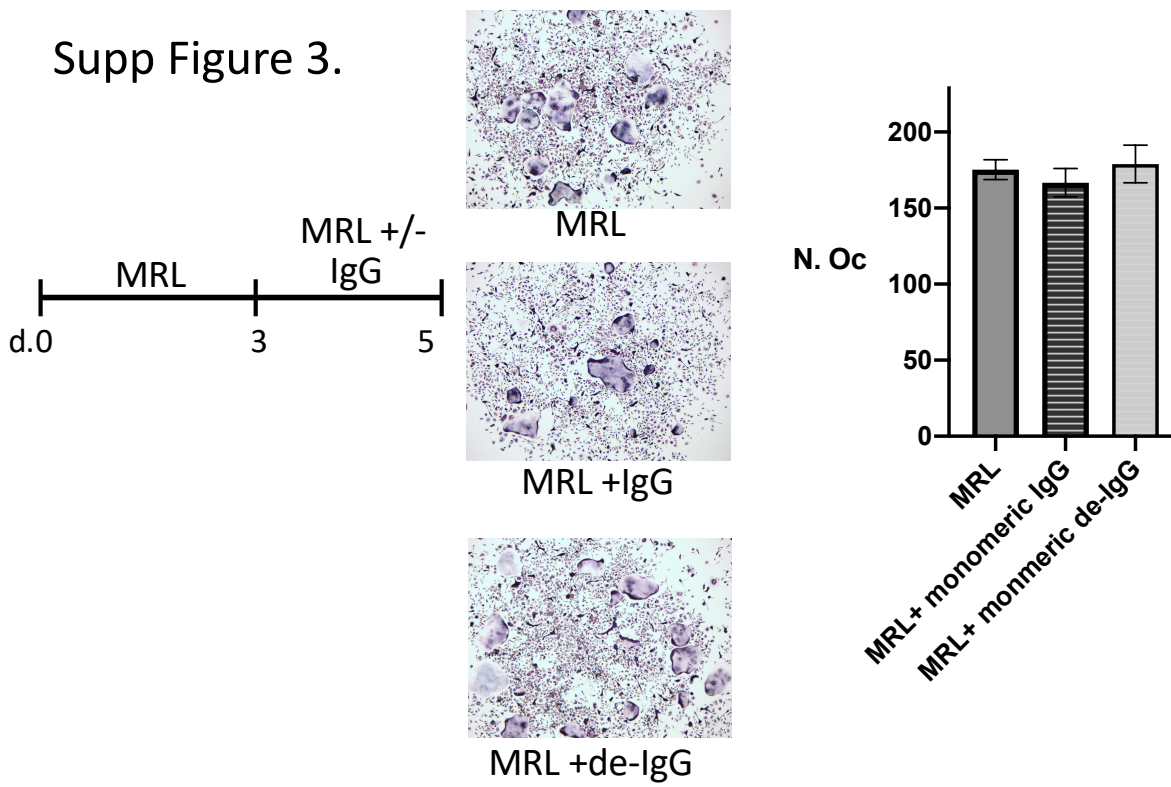

Representative micro images of murine osteoclast stimulation initial treatment with M-CSF +RANKL (MRL) and after 3-days with additional adding of  $0.1 \text{ mg}\cdot\text{ml}^{-1}$  IgG both untreated and desialylated (de).
